## **Association of polygenic risk scores for coronary artery disease with subsequent events amongst established cases**

Laurence J. Howe <sup>1</sup>, Frank Dudbridge <sup>2</sup>, A. Floriaan Schmidt <sup>1,3</sup>, Chris Finan <sup>1</sup>, Spiros Denaxas <sup>4</sup>, Folkert W. Asselbergs <sup>1,3</sup>, Aroon D. Hingorani <sup>1</sup>, Riyaz S. Patel <sup>1, \*</sup>

Correspondence to [Riyaz.Patel@ucl.ac.uk](mailto:Riyaz.Patel@ucl.ac.uk)

<sup>1</sup> Institute of Cardiovascular Science, Faculty of Population Health Sciences, University College London, London, NW1 2DA, UK

<sup>2</sup> Department of Health Sciences, University of Leicester, Leicester, LE1 7RH, UK

<sup>3</sup> Department of Cardiology, University Medical Center Utrecht, University of Utrecht, Utrecht, 3584 CX, Netherlands

<sup>4</sup> Institute of Health Informatics, Faculty of Population Health Sciences, University College London, London, NW1 2DA, UK

## Abstract

**Background:** There is growing evidence that polygenic risk scores (PRS) can be used to identify individuals at high lifetime risk of coronary artery disease (CAD). Whether they can also be used to stratify risk of subsequent events among those surviving a first CAD event remains uncertain.

**Methods:** Using two subsamples of UK Biobank, defined at baseline as prevalent CAD (N=10,287) and without CAD (N=393,108), we evaluated associations between a CAD PRS and incident cardiovascular and fatal outcomes, during a median follow up of 7.8 years.

**Results:** A 1 S.D. higher PRS was associated with increased risk of incident MI in participants without CAD (OR 1.33; 95% C.I. 1.29, 1.38), but the effect estimate was markedly attenuated in those with prevalent CAD (OR 1.15; 95% C.I. 1.06, 1.25); heterogeneity  $P = 0.0012$ . Additionally, among prevalent CAD cases, we found evidence of an inverse association between the CAD PRS and risk of all-cause death (OR 0.91; 95% C.I. 0.85, 0.98) compared to those without CAD (OR 1.01; 95% C.I. 0.99, 1.03); heterogeneity  $P = 0.0041$ . A similar inverse association was found for ischaemic stroke (Prevalent CAD (OR 0.78; 95% C.I. 0.67, 0.90); without CAD (OR 1.09; 95% C.I. 1.04, 1.15), heterogeneity  $P < 0.001$ ).

**Conclusions:** Bias induced by case stratification and survival into UK Biobank may attenuate, or reverse, associations of polygenic risk scores derived from case-control studies or populations initially free of disease. Polygenic risk scores for subsequent events should be derived from new genome wide association studies conducted in patients with established disease.

**Keywords:** Coronary artery disease, polygenic risk scores, subsequent events, index event bias, genome-wide association study

### **Key messages**

- CAD PRS are positively associated with incident myocardial infarction risk amongst established CAD cases.
- However, the effect size is attenuated compared to estimates from CAD-free populations.
- CAD PRS are inversely associated with mortality and stroke risk amongst established CAD cases.
- These associations may reflect index event bias induced by stratifying on case status.
- Dedicated GWAS of coronary disease progression are required to improve prediction of subsequent event risk.

## Introduction

Coronary artery disease (CAD) is heritable, with over 300 independent genetic loci with additive effects known to influence disease risk having been identified in Genome-Wide Association Studies (GWAS) (1-4). Exploiting the increasing amount of risk variation captured by identified loci, recent studies have illustrated the potential use of CAD polygenic risk scores (PRS) for identifying individuals at elevated risk of CAD (5-7), where the scores are based on counts of the number of risk alleles carried.

However, the extent to which CAD PRS derived from general population cohorts or case-control GWAS are associated with CAD disease progression, as characterized by subsequent or recurrent events amongst diseased cases, remains unclear. Indeed, established risk variants for onset of CAD may not necessarily equate with variants influencing risk of subsequent events because of genuine aetiological differences between the pathophysiology of the two states (8) (9). Alternatively, even if variants influencing disease onset also genuinely influence progression, associations may be distorted because of index event bias, where conditioning on an index event (e.g. presence of CAD) may induce confounded associations between risk factors in the sample of individuals with the index event (10, 11). The lack of a strong association between the major CAD risk locus at 9p21 and subsequent event risk highlights possible differences in genetic associations of CAD risk variants dependent on case status (12) (13).

Previous studies have found some evidence that CAD PRS are associated with increased risk of subsequent events (e.g. recurrent MI and revascularization) (7, 14-19), although a recent study in a French-Canadian population found that CAD

PRS are substantially less effective at predicting recurrence and incident cases than prevalence (7). Stronger conclusions have been limited by the modest sample sizes of recurrence studies, with most previous studies including less than 5000 cases, as well as the inconsistency of cardiovascular and fatal endpoints across different studies.

Using two subsamples of UK Biobank, defined as individuals (a) free of CAD; and (b) those with evidence of prevalent CAD at enrolment, we aimed to evaluate the extent to which associations between CAD genetic risk variants and incident events differ when restricting to a case-only sample while also running several exploratory analyses to detect and account for potential index event bias.

## **Methods**

### Data sources

#### *UK Biobank*

UK Biobank is a large-scale cohort study, which recruited approximately 500,000 individuals aged between 40 and 69 years from across the United Kingdom. Genotype data are available for the majority of participants with extensive phenotype data collected via questionnaire at baseline. Study participants are linked to electronic health record data from Hospital Episode Statistics (HES), secondary care data containing International Classification of Diseases, 10<sup>th</sup> Revision (ICD10) and Office of Population Censuses and Surveys Classification of Surgical Operations (OPCS) codes relating to study participants diagnoses and operative procedures. Study participants are also linked to the mortality register from the Office of National

Statistics (ONS) which contains data on death, time of death, as well as primary and secondary causes (20).

For the purposes of this study, we used a sample of 408,480 individuals which was generated by starting with the full sample and removing individuals of non-European descent, individuals with more than 10 putative third-degree relatives in the kinship table and individuals who were flagged in quality control (sex mismatch, heterozygosity and individual missingness). We then defined two subsamples for our analyses; a) baseline CAD controls, generated by removing prevalent CAD cases (see below) and individuals that self-reported as having had a heart attack (Field ID: 6150-0.0, 20002-0.0) or coronary angioplasty/coronary artery bypass grafts (Field ID: 20004-0.0), and b) prevalent CAD cases identified using the following ICD10 (I21-I25, Z955) and OPCS codes (K40-K46, K471, K49, K50, K75) from HES occurring before their study enrolment date. In secondary analyses, CAD cases were stratified into coronary artery disease with myocardial infarction (CADMI) cases (ICD10: I21-23, I241, I252) and coronary artery disease cases with no evidence of myocardial infarction (CADnoMI).

Phenotype data collected at baseline included sex, age, body mass index (BMI) (Field ID: 21001-0.0), systolic blood pressure (SBP) (Field ID: 4080-0.0), self-reported type II diabetes (Field ID: 2443-0.0), self-reported smoking status (Field ID: 20116-0.0) and self-reported statin use (Field ID: 20003).

Incident events after recruitment into the UK Biobank were ascertained using ICD10 and OPCS codes from HES using similar codes to published phenotyping algorithms (21). Incident cardiovascular events of interest included: MI (I21-23, I241, I252), heart failure (I110, I130, I132, I260, I50), ischemic stroke (I63, I693), stroke

(I60-64, I69) and revascularization (K40-46, K471, K49, K50, K75). Fatal events of interest included cardiovascular (CVD) death, CAD death and all-cause death and were ascertained using primary cause of death from mortality register data using ICD codes for cause-specific mortality. Composite events of interest were combined CAD death/MI and a combined variable including all cardiovascular outcomes. More information on relevant ICD10 and OPCS codes are contained in **Supplementary Table 1**.

UK Biobank study participants (N=488,347) were assayed using the UK BiLEVE Axiom™ Array by Affymetrix1 (N= 49,950) and the closely related UK Biobank Axiom™ Array (N= 438,427). Directly genotyped variants were pre-phased using SHAPEIT3 (22) and imputed using Impute4 and the UK10K (23), Haplotype Reference Consortium (24) and 1000 Genomes Phase 3 (25) reference panels with post-imputation data including ~96 million genetic variants (26, 27).

#### *CARDIOGRAMPlusC4D*

CARDIOGRAMPlusC4D (28) is a global collaboration of studies using a case-control approach to identify genetic variants associated with the presence of CAD. In this study, we used publicly available GWAS summary data from a recent consortium study independent of UK Biobank (2), which were downloaded from the CARDIOGRAM website (<http://www.cardiogramplusc4d.org/data-downloads/>).

#### Statistical analysis

##### *CAD PRS*

We used GWAS summary data from CARDIOGRAMPlusC4D to construct a CAD PRS of SNPs. Initially, all SNPs meeting a P-value inclusion criterion ( $P < 5 \times 10^{-6}$ ) were considered in order to generate a restrictive score containing only loci with

relatively strong evidence for association with CAD. Highly correlated markers were then removed by LD clumping ( $R^2 < 0.2$ , 250 kb distance threshold) the summary data using PLINK v1.9 (29) and the 1000 Genomes Phase 3 (GBR samples) (25). The final CAD PRS included 182 SNPs with the contribution of each SNP weighted by the GWAS effect estimates.

#### *CAD PRS and incident events*

Associations between the CAD PRS and incident cardiovascular (stroke, ischemic stroke, myocardial infarction, heart failure, revascularization), fatal (all-cause death, CVD death and CAD death) and composite (all CVD, CAD death or MI) outcomes were evaluated in the baseline CAD case and control samples. Logistic regression was used to estimate associations, with all analyses adjusted for age and sex. For comparison, we presented effect estimates in the two samples and tested for heterogeneity between these estimates (30). As a sensitivity analysis, we stratified the case only sample by type of CAD (CADMI / CADnoMI) and compared estimates between the two samples with a test for heterogeneity. All estimates were presented in terms of a standard deviation increase in the PRS.

#### *CAD PRS and baseline covariates*

Index event bias may lead to confounded associations between different CAD risk factors (e.g. between CAD PRS and BMI) amongst cases which are not present or are not as strong in samples of CAD free individuals. In turn, these may confound associations between risk factors and subsequent events (31). Therefore, we quantified and compared associations between CAD risk factors and the CAD PRS in the case and CAD-free samples.



As covariates of interest we chose established risk factors for CAD available in UK Biobank (age, sex, SBP, BMI, type II diabetes, ever smoking and statin use), which were collected at study baseline. Linear or logistic regression models in R v3.6.0 were used to estimate associations between the CAD PRS and covariates in the baseline CAD case and control samples. Analyses with age and sex as the phenotypes of interest were run unadjusted, with all other regression models including age and sex as covariates. For comparison, we presented the value of covariates of interest at quintiles (20%, 40%, 60%, 80%) of the CAD PRS distribution and formally tested for heterogeneity between estimates for first and subsequent events (30).

#### *Accounting for index event bias*

To evaluate the potential effects of index event bias on our analyses, we ran sensitivity analyses using two different approaches. First, we repeated the CAD PRS and incident events analyses in the baseline CAD case sample, including SBP, BMI, type II diabetes, ever smoking and statin use as covariates. These CAD risk factors were included as covariates to attempt to account for confounded associations between the CAD PRS and these covariates relating to index event bias.

Second, we used a recently proposed method to correct for index event bias in GWAS. SNP effects on prognosis (i.e. on events occurring after an index event) are adjusted using residuals from the regression of the SNP effects on the index event against the SNP effects on prognosis. The main caveat with the approach is that it assumes that the direct genetic effects on incidence and prognosis are independent (32).

In this instance, the index event is existing CAD so we used GWAS summary data from the CARDIOGRAMPlusC4D GWAS (2). For a GWAS of prognosis, we used the UK Biobank CAD case sample (N=10,287) to perform a GWAS of all-cause mortality using a logistic model in snptest v2.5.2 (33), including age, sex and the first ten principal components as covariates. As suggested previously (32), we then extracted 116,438 independent SNPs common to both the CARDIOGRAMPlusC4D and the UK Biobank GWAS summary statistics by restricting to well-imputed SNPs (INFO>0.99) and LD pruning (250 kb step window, 5 SNP step size,  $r^2=0.1$ ) using the 1000 Genomes GBR samples (Phase 3) (25) as a reference panel. These SNPs were then used to calculate the slope correction estimate using the SIMEX (34) option in the IndexEvent.R package with a Hedges-Olkin estimate calculated as a sensitivity analysis. When applying this in practice, the SIMEX slope estimates did not converge using all SNPs, even with 10,000 simulations, so we decided to reduce noise by removing SNPs not strongly associated with the index trait and calculate the slope using a subset of 5564 SNPs which were nominally associated with the index trait in CARDIOGRAMPlusC4D ( $P<0.05$ ).

Next, we adjusted the betas and standard errors in the UK Biobank GWAS of mortality using the slope of the regression. For example, the adjusted betas were calculated by subtracting the product of the slope estimate and the CARDIOGRAM incidence beta estimate from the prognosis beta for each SNP. Finally, to estimate the association between the CAD PRS and mortality amongst CAD cases from summary data (instead of individual level data as previously), we used an inverse-variance weighted method (35) (36) across 54 independent SNPs (28) using CAD as the exposure and mortality as the outcome. The subset of chosen independent SNPs reached genome-wide significance in the largest GWAS independent of UK

Biobank. Estimates were presented in terms of the association of an increase in the CAD PRS, corresponding to an odds increase of CAD, with log-odds of mortality. For comparison, we estimated the PRS association before and after correction.

## Results

### CAD PRS and incident events

Associations between the PRS and incident events differed greatly between the two samples, with confidence intervals non-overlapping for eight out of the ten outcomes tested (heterogeneity  $P < 0.05$ ). In the CAD free sample, we found strong evidence of positive associations between the CAD PRS and incident cardiovascular and fatal outcomes such as MI (OR 1.34; 95% C.I. 1.29, 1.38), CAD death (OR 1.31; 95% C.I. 1.23, 1.40) and ischemic stroke (OR 1.09; 95% C.I. 1.04, 1.15). In contrast, in the prevalent CAD sample, we found evidence of a positive, but attenuated association with MI (OR 1.15; 95% C.I. 1.06, 1.25; Int  $P=0.012$ ), weak evidence for an association with CAD death (OR 0.96; 95% C.I. 0.85, 1.08; Int  $P=9.1 \times 10^{-6}$ ) and evidence of inverse associations with all-cause death (OR 0.91; 95% C.I. 0.85, 0.98; Int  $P = 0.0041$ ) and ischemic stroke (OR 0.78; 95% C.I. 0.67, 0.90; Int  $P = 1.8 \times 10^{-5}$ ) (**Figure 1 / Table 1**). Amongst prevalent CAD cases, we did not find strong evidence of heterogeneity by CAD subtype (CAD without prior MI, CAD with prior MI) with overlapping confidence intervals across all outcomes (**Supplementary Table 2**).

**Table 1: Associations between CAD GRS and incident events**

| <b>Outcome</b>   | <b>No CAD at baseline<br/>(N=393,108)<br/>OR (95% C.I.)</b> | <b>Prevalent CAD cases<br/>(N=10,287)<br/>OR (95% C.I.)</b> | <b>Heterogeneity P-value</b> |
|------------------|-------------------------------------------------------------|-------------------------------------------------------------|------------------------------|
| CAD death/MI     | 1.33 (1.29, 1.38)                                           | 1.11 (1.03, 1.20)                                           | 1.4x10 <sup>-5</sup>         |
| CV death         | 1.20 (1.14, 1.26)                                           | 0.97 (0.87, 1.09)                                           | 0.0012                       |
| All-cause death  | 1.01 (0.99, 1.03)                                           | 0.91 (0.85, 0.98)                                           | 0.0041                       |
| CAD death        | 1.31 (1.23, 1.40)                                           | 0.96 (0.85, 1.08)                                           | 9.1x10 <sup>-6</sup>         |
| MI               | 1.34 (1.29, 1.38)                                           | 1.15 (1.06, 1.25)                                           | 0.0012                       |
| Revasc           | 0.99 (0.97, 1.01)                                           | 0.91 (0.84, 1.00)                                           | 0.067                        |
| Heart failure    | 1.00 (0.93, 1.08)                                           | 0.97 (0.86, 1.10)                                           | 0.67                         |
| Stroke           | 1.05 (1.01, 1.09)                                           | 0.88 (0.78, 1.00)                                           | 0.0094                       |
| Ischaemic stroke | 1.09 (1.04, 1.15)                                           | 0.78 (0.67, 0.90)                                           | 1.8x10 <sup>-5</sup>         |
| All CVD          | 1.06 (1.04, 1.08)                                           | 0.99 (0.93, 1.04)                                           | 0.013                        |

<sup>†</sup> All OR per 1 S.D. increase in CAD GRS of 182 SNPs

### CAD PRS and baseline covariates

The CAD PRS was inversely associated with age, BMI and smoking initiation and positively associated with statin use in both samples, with some evidence of larger effect sizes in the CAD sample for age (Int P=0.0064), statin use (Int P<0.001) and BMI (Int P=0.011). In contrast, we found some evidence that the CAD PRS is associated with increased SBP in those without CAD, but this association was largely attenuated in the prevalent CAD sample (Int P=0.020). Similarly, the direction of effect estimates differed between the two samples for type II diabetes with some weak evidence of heterogeneity (heterogeneity P=0.053) (**Table 2**) (**Supplementary Figures 1-7**).

**Table 2- Associations between CAD GRS and covariates**

| Covariate                     |                                | Values of covariates at quintiles of the CAD GRS distribution |       |       |       | Heterogeneity P-value <sup>1</sup> |
|-------------------------------|--------------------------------|---------------------------------------------------------------|-------|-------|-------|------------------------------------|
|                               |                                | 20%                                                           | 40%   | 60%   | 80%   |                                    |
| Age (Years)                   | No CAD at baseline (N=393,108) | 66.7                                                          | 66.7  | 66.6  | 66.6  | 0.0064                             |
|                               | Prevalent CAD cases (N=10,287) | 72.3                                                          | 72.1  | 72.0  | 71.9  |                                    |
| Sex (Male=1 Female=0)         | No CAD at baseline (N=393,108) | 0.47                                                          | 0.45  | 0.44  | 0.43  | 0.84                               |
|                               | Prevalent CAD cases (N=10,287) | 0.82                                                          | 0.80  | 0.79  | 0.77  |                                    |
| Statin use (Yes=1 No=0)       | No CAD at baseline (N=393,108) | 0.04                                                          | 0.10  | 0.16  | 0.24  | 2.3x10 <sup>-5</sup>               |
|                               | Prevalent CAD cases (N=10,287) | 0.67                                                          | 0.81  | 0.93  | >1.0  |                                    |
| Type II Diabetes (Yes=1 No=0) | No CAD at baseline (N=393,108) | 0.03                                                          | 0.04  | 0.05  | 0.05  | 0.053                              |
|                               | Prevalent CAD cases (N=10,287) | 0.21                                                          | 0.19  | 0.17  | 0.14  |                                    |
| SBP (mmHg)                    | No CAD at baseline (N=393,108) | 139.4                                                         | 139.7 | 139.9 | 140.2 | 0.020                              |
|                               | Prevalent CAD cases (N=10,287) | 139.3                                                         | 139.4 | 139.4 | 139.4 |                                    |
| BMI (kg/m <sup>2</sup> )      | No CAD at baseline (N=393,108) | 27.2                                                          | 27.1  | 27.1  | 27.1  | 0.011                              |
|                               | Prevalent CAD cases (N=10,287) | 29.1                                                          | 29.0  | 28.9  | 28.9  |                                    |
| Smoking                       | No CAD at                      | 0.45                                                          | 0.44  | 0.44  | 0.44  | 0.11                               |

|                     |                                      |      |      |      |      |  |
|---------------------|--------------------------------------|------|------|------|------|--|
| (Ever=1<br>Never=0) | baseline<br>(N=393,108)              |      |      |      |      |  |
|                     | Prevalent<br>CAD cases<br>(N=10,287) | 0.70 | 0.67 | 0.65 | 0.63 |  |

<sup>†</sup> Test for heterogeneity between regression estimates in prevalent case and control samples

### Accounting for index event bias

First, we included CAD risk factors (SBP, BMI, smoking, diabetes) and statin use as covariates in the model to account for potential index event bias. Although estimates in general moved slightly closer to the non-case estimates from **Table 1**, we did not find evidence of discernible statistical differences when including these covariates (**Table 3**).

**Table 3: Association of CAD GRS with subsequent incident events adjusted for covariates**

| Outcome          | Prevalent CAD cases (N=10,287)<br>OR (95% C.I.) |                                                                         |
|------------------|-------------------------------------------------|-------------------------------------------------------------------------|
|                  | Adjusted for age and sex.                       | Adjusted for age, sex, statin-use, SBP, diabetes, BMI and ever smoking. |
| CAD death/MI     | 1.11 (1.03, 1.20)                               | 1.14 (1.06, 1.24)                                                       |
| CV death         | 0.97 (0.87, 1.09)                               | 0.98 (0.87, 1.11)                                                       |
| All-cause death  | 0.91 (0.85, 0.98)                               | 0.92 (0.85, 0.99)                                                       |
| CAD death        | 0.96 (0.85, 1.08)                               | 0.98 (0.86, 1.12)                                                       |
| MI               | 1.15 (1.06, 1.25)                               | 1.18 (1.08, 1.29)                                                       |
| Revasc           | 0.91 (0.84, 1.00)                               | 0.90 (0.82, 0.98)                                                       |
| Heart failure    | 0.97 (0.86, 1.10)                               | 1.04 (0.91, 1.19)                                                       |
| Stroke           | 0.88 (0.78, 1.00)                               | 0.92 (0.81, 1.05)                                                       |
| Ischaemic stroke | 0.78 (0.67, 0.90)                               | 0.82 (0.70, 0.95)                                                       |
| All CVD          | 0.99 (0.93, 1.04)                               | 1.00 (0.94, 1.06)                                                       |

<sup>†</sup> All OR per 1 S.D. increase in CAD GRS of 182 SNPs

Second, we applied a method to correct for index event bias in GWAS (32). The regression of genetic effects for prognosis on those for incidence generated a positive slope estimate using both SIMEX (0.0655; 95% C.I. 0.646, 0.0664) and the Hedges-Olkin estimator (0.0516). Prior to the adjustment using the SIMEX estimate, a 1-unit odds increase in genetic liability to CAD was associated with reduced odds of mortality (OR 0.76; 95% C.I. 0.65, 0.90;  $P=0.0018$ ), directionally concordant with the individual level data analysis which was scaled differently (see **Table 1**). After correction, the association between the CAD PRS and mortality increased in magnitude with a slightly more extreme inverse association, although confidence intervals overlap before and after correction (OR 0.72; 95% C.I. 0.60, 0.85;  $P=0.0001$ ).

## Discussion

In this study, we have demonstrated that associations of CAD PRS with covariates and incident cardiovascular and fatal outcomes differ between those with and without prior CAD. Notably, we found that associations of the PRS with risk of future MI and CAD death were greatly attenuated among those with established CAD, with some evidence of a positive association for MI but very weak evidence for a positive association with CAD death, compared to those without CAD. Furthermore, we found evidence for inverse associations between the CAD PRS and all-cause death and ischaemic stroke amongst cases which were not present in individuals without known CAD.

These findings could be partially explained by index event bias, whereby stratifying on case status induces non-causal associations between genetic variants and risk factors. For example, individuals with high genetic risk for CAD may develop

coronary disease despite low levels of conventional CAD risk factors such as smoking and adiposity. Indeed, we found some evidence that higher CAD PRS are associated with reduced BMI and smoking initiation in both samples, with more extreme effect sizes observed in the case sample suggesting that attenuated associations may be attributable to cases with higher genetic risk being otherwise healthier. Similarly, another possibility is that bias may be induced by the selection of study participants into UK Biobank; individuals with high genetic risk for CAD may be more likely to die prior to being recruited into the study or decline participation for a health reason. This possibility is supported by the inverse association between the CAD PRS and age, again with a larger effect size amongst cases which suggests that individuals with higher genetic risk for CAD may have increased mortality. A further possibility is that the difference in associations are partially explained by aetiological heterogeneity between CAD onset and progression, characterised by differential drivers of stable and unstable plaque risk. However, it seems unlikely that the observed protective associations of the CAD PRS with all-cause death and ischemic stroke are explained by biological differences.

Medication use such as statins may also have contributed to the inverse associations in individuals with prevalent CAD, with previous evidence suggesting that statin use is more effective in those with higher genetic risk to CAD (19, 37). This interaction likely relates to genetic overlap between CAD and LDL cholesterol, the target of statins, with higher genetic risk individuals more likely to have elevated LDL cholesterol. However, although statins may be more effective in individuals with higher genetic risk that doesn't necessarily equate to lower absolute risk amongst individuals with elevated genetic risk, as our results imply for several outcomes.



Indeed, in one of the previously cited studies (19), individuals with higher genetic risk were found to have increased mortality.

To investigate the potential effects of index event bias on our analyses, we applied two distinct methods. However, the two methods shifted estimates in opposite directions; adjusting for covariates moved the estimates towards the non-case sample estimates while the index event correction strengthened the inverse association between the CAD PRS and mortality amongst cases. One possible explanation for the increased inverse association after the index event correction, is that the method assumes that the direct effects of prognosis and incidence are independent. In the context of coronary disease, there are clearly factors which influence both incidence and prognosis, such as LDL cholesterol, suggesting this assumption may not hold.

Our findings have several important implications. First, although we did not formally evaluate prediction metrics, the modest odds ratios observed suggest that despite PRS positively associating with MI risk amongst diseased cases, existing PRS are likely to have limited effectiveness for prediction of subsequent events and therefore risk stratification in this setting (38). These findings imply that genetic prediction of subsequent coronary disease events is likely to require dedicated GWAS of coronary disease progression. Second, our findings contribute to the existing literature (13, 31, 32, 39, 40) emphasising the caution required when using genetic data to infer causality in the context of disease progression. Genetic associations are generally thought to be causal by analogy with Mendelian randomization (41) because of the reduced possibility of confounding and reverse causation, but the observed protective associations of CAD PRS with mortality and ischemic stroke suggest that this may not hold for case-only studies. Index event

bias has been shown to have modest impact on individual SNPs effects (39) but our results illustrate that bias likely accumulates when combining multiple markers together in a PRS, which could also affect Mendelian randomization studies. Third, the observed associations between the CAD PRS and age across both CAD cases and controls in UK Biobank suggest that potential bias from selection into UK Biobank requires further investigation and consideration in genetic studies (10).

Our study has notable limitations. First, our analyses used only the UK Biobank and require independent replication in different datasets and populations. Second, we could not differentiate between the effects of possible biases and genuine biological differences between onset and progression. Third, available biomarker data including LDL cholesterol was not available in UK Biobank at the time of writing, so we were unable to explore associations between the CAD PRS and CAD related biomarkers. Fourth, other researchers have derived more accurate PRS from the CardioGramPLUSC4D data than ours (5, 6); however, individual risk prediction was not our goal, and given the positive association of our PRS with CAD incidence we expect the same qualitative findings would result from PRS including a greater number of weakly associated SNPs.

In conclusion, we have illustrated that associations between CAD genetic risk variants and cardiovascular outcomes differ when examined in those with and without prior CAD. This may be due to index event bias, although other possibilities need to be explored. Future work, such as dedicated GWAS of disease progression, by initiatives such as the GENIUS-CHD consortium (40) will aim to further explore genetic differences between onset and progression of CAD.

## **Acknowledgements**

This work was supported by a British Heart Foundation Intermediate Fellowship (Dr Patel, grant number FS/14/76/30933). This research was also supported by the National Institute for Health Research University College London Hospitals Biomedical Research Centre; Dr Schmidt is funded by a British Heart Foundation grant number PG/18/5033837. Prof Hingorani is a National Institute for Health Research Senior Investigator; Prof Asselbergs is supported by University College London Hospitals National Institute for Health Research Biomedical Research Centre, European Union/European Federation of Pharmaceutical Industries and Associations Innovative Medicines Initiative 2 Joint Undertaking BigData@Heart grant n° 116074, the European Union's Horizon 2020 research and innovation programme under the ERA-NET Co-fund action N°01KL1802 (Druggable-MI-gene) jointly funded by the Dutch Heart Foundation and Netherlands Organization for Health Research and Development (ZonMw). The funder(s) of the study had no role in study design, data collection, data analysis, data interpretation, or writing of the report.

## **Conflicts of interest**

Dr Patel has received speaker fees and honoraria from Amgen, Sanofi and Bayer and research grant funding from Regeneron. Dr Asselbergs has received research funding from Regeneron, Pfizer and Sanofi. The other authors report no conflicts.

## **Data availability**

The summary statistics for the GWAS of all-cause mortality amongst CAD cases in UK Biobank conducted in this study will be made publicly available upon study publication.

## References

1. Nelson CP, Goel A, Butterworth AS, Kanoni S, Webb TR, Marouli E, et al. Association analyses based on false discovery rate implicate new loci for coronary artery disease. *Nature Genetics*. 2017;49(9):1385.
2. Nikpay M, Goel A, Won H-H, Hall LM, Willenborg C, Kanoni S, et al. A comprehensive 1000 Genomes-based genome-wide association meta-analysis of coronary artery disease. *Nature Genetics*. 2015;47(10):1121.
3. Schunkert H, König IR, Kathiresan S, Reilly MP, Assimes TL, Holm H, et al. Large-scale association analysis identifies 13 new susceptibility loci for coronary artery disease. *Nature Genetics*. 2011;43(4):333.
4. Deloukas P, Kanoni S, Willenborg C, Farrall M, Assimes TL, Thompson JR, et al. Large-scale association analysis identifies new risk loci for coronary artery disease. *Nature Genetics*. 2013;45(1):25.
5. Inouye M, Abraham G, Nelson CP, Wood AM, Sweeting MJ, Dudbridge F, et al. Genomic Risk Prediction of Coronary Artery Disease in 480,000 Adults: Implications for Primary Prevention. *Journal of the American College of Cardiology*. 2018;72(16):1883-93.
6. Khera AV, Chaffin M, Aragam KG, Haas ME, Roselli C, Choi SH, et al. Genome-wide polygenic scores for common diseases identify individuals with risk equivalent to monogenic mutations. *Nature Genetics*. 2018;50(9):1219.
7. Wunnemann F, Sin Lo K, Langford-Avelar A, Busseuil D, Dube MP, Tardif JC, et al. Validation of Genome-Wide Polygenic Risk Scores for Coronary Artery Disease in French Canadians. *Circulation Genomic and precision medicine*. 2019;12(6):e002481.
8. Reilly MP, Li M, He J, Ferguson JF, Stylianou IM, Mehta NN, et al. Identification of ADAMTS7 as a novel locus for coronary atherosclerosis and association of ABO with myocardial infarction in the presence of coronary atherosclerosis: two genome-wide association studies. *The Lancet*. 2011;377(9763):383-92.
9. Falk E, Nakano M, Bentzon JF, Finn AV, Virmani R. Update on acute coronary syndromes: the pathologists' view. *European heart journal*. 2012;34(10):719-28.
10. Munafò MR, Tilling K, Taylor AE, Evans DM, Davey Smith G. Collider scope: when selection bias can substantially influence observed associations. *International Journal of Epidemiology*. 2017;47(1):226-35.
11. Dahabreh IJ, Kent DM. Index event bias as an explanation for the paradoxes of recurrence risk research. *JAMA*. 2011;305(8):822-3.
12. Patel RS, Asselbergs FW, Quyyumi AA, Palmer TM, Finan CI, Tragante V, et al. Genetic variants at chromosome 9p21 and risk of first versus subsequent coronary heart disease events: a systematic review and meta-analysis. *Journal of the American College of Cardiology*. 2014;63(21):2234-45.
13. Patel RS, Schmidt AF, Tragante V, McCubrey RO, Holmes MV, Howe LJ, et al. Association of Chromosome 9p21 with Subsequent Coronary Heart Disease Events: A GENIUS-CHD Study of Individual Participant Data. *Circulation Genomic and precision medicine*. 2019.
14. Christiansen MK, Nyegaard M, Larsen SB, Grove EL, Würtz M, Neergaard-Petersen S, et al. A genetic risk score predicts cardiovascular events in patients with stable coronary artery disease. *International Journal of Cardiology*. 2017;241:411-6.
15. Tragante V, Doevendans PA, Nathoe HM, van der Graaf Y, Spiering W, Algra A, et al. The impact of susceptibility loci for coronary artery disease on other vascular domains and recurrence risk. *European Heart Journal*. 2013;34(37):2896-904.
16. Vaara S, Tikkanen E, Parkkonen O, Lokki M-L, Ripatti S, Perola M, et al. Genetic risk scores predict recurrence of acute coronary syndrome. *Circulation: Genomic and Precision Medicine*. 2016:CIRCGENETICS. 115.001271.

17. Weijmans M, de Bakker PI, van der Graaf Y, Asselbergs FW, Algra A, de Borst GJ, et al. Incremental value of a genetic risk score for the prediction of new vascular events in patients with clinically manifest vascular disease. *Atherosclerosis*. 2015;239(2):451-8.
18. Wirtwein M, Melander O, Sjögren M, Hoffmann M, Narkiewicz K, Gruchala M, et al. Relationship between selected DNA polymorphisms and coronary artery disease complications. *International Journal of Cardiology*. 2017;228:814-20.
19. Mega JL, Stitzel NO, Smith JG, Chasman DI, Caulfield MJ, Devlin JJ, et al. Genetic risk, coronary heart disease events, and the clinical benefit of statin therapy: an analysis of primary and secondary prevention trials. *The Lancet*. 2015;385(9984):2264-71.
20. Bycroft C, Freeman C, Petkova D, Band G, Elliott LT, Sharp K, et al. The UK Biobank resource with deep phenotyping and genomic data. *Nature*. 2018;562(7726):203.
21. Denaxas SC, George J, Herrett E, Shah AD, Kalra D, Hingorani AD, et al. Data resource profile: cardiovascular disease research using linked bespoke studies and electronic health records (CALIBER). *International Journal of Epidemiology*. 2012;41(6):1625-38.
22. O'Connell J, Sharp K, Shrine N, Wain L, Hall I, Tobin M, et al. Haplotype estimation for biobank-scale data sets. *Nature Genetics*. 2016;48(7):817-20.
23. Consortium UK. The UK10K project identifies rare variants in health and disease. *Nature*. 2015;526(7571):82-90.
24. McCarthy S, Das S, Kretzschmar W, Delaneau O, Wood AR, Teumer A, et al. A reference panel of 64,976 haplotypes for genotype imputation. *Nature Genetics*. 2016;48(10):1279.
25. Genomes Project Consortium. A global reference for human genetic variation. *Nature*. 2015;526(7571):68-74.
26. Allen NE, Sudlow C, Peakman T, Collins R. UK biobank data: come and get it. *American Association for the Advancement of Science*; 2014.
27. Bycroft C, Freeman C, Petkova D, Band G, Elliott LT, Sharp K, et al. Genome-wide genetic data on ~ 500,000 UK Biobank participants. *bioRxiv*. 2017:166298.
28. Nikpay M, Goel A, Won HH, Hall LM, Willenborg C, Kanoni S, et al. A comprehensive 1,000 Genomes-based genome-wide association meta-analysis of coronary artery disease. *Nat Genet*. 2015;47(10):1121-30.
29. Purcell S, Neale B, Todd-Brown K, Thomas L, Ferreira MA, Bender D, et al. PLINK: a tool set for whole-genome association and population-based linkage analyses. *The American Journal of Human Genetics*. 2007;81(3):559-75.
30. Altman DG, Bland JM. Interaction revisited: the difference between two estimates. *BMJ*. 2003;326(7382):219.
31. Paternoster L, Tilling K, Smith GD. Genetic epidemiology and Mendelian randomization for informing disease therapeutics: Conceptual and methodological challenges. *PLoS Genetics*. 2017;13(10):e1006944.
32. Dudbridge F, Allen RJ, Sheehan NA, Schmidt AF, Lee JC, Jenkins RG, et al. Adjustment for index event bias in genome-wide association studies of subsequent events. *Nature Communications*. 2019:436063.
33. Marchini J, Howie B, Myers S, McVean G, Donnelly P. A new multipoint method for genome-wide association studies by imputation of genotypes. *Nat Genet*. 2007;39(7):906-13.
34. Bowden J, Del Greco M F, Minelli C, Davey Smith G, Sheehan NA, Thompson JR. Assessing the suitability of summary data for two-sample Mendelian randomization analyses using MR-Egger regression: the role of the I<sup>2</sup> statistic. *International Journal of Epidemiology*. 2016;45(6):1961-74.
35. Palla L, Dudbridge F. A Fast Method that Uses Polygenic Scores to Estimate the Variance Explained by Genome-wide Marker Panels and the Proportion of Variants Affecting a Trait. *American journal of human genetics*. 2015;97(2):250-9.
36. Burgess S, Butterworth A, Thompson SG. Mendelian randomization analysis with multiple genetic variants using summarized data. *Genetic epidemiology*. 2013;37(7):658-65.

37. Natarajan P, Young R, Stitzel NO, Padmanabhan S, Baber U, Mehran R, et al. Polygenic Risk Score Identifies Subgroup With Higher Burden of Atherosclerosis and Greater Relative Benefit From Statin Therapy in the Primary Prevention Setting. *Circulation*. 2017;135(22):2091-101.
38. Wald NJ, Morris JK. Assessing risk factors as potential screening tests: a simple assessment tool. *Archives of Internal Medicine*. 2011;171(4):286-91.
39. Hu Y-J, Schmidt AF, Dudbridge F, Holmes MV, Brophy JM, Tragante V, et al. Impact of selection bias on estimation of subsequent event risk. *Circulation: Cardiovascular Genetics*. 2017;10(5):e001616.
40. Patel R, Tragante V, Schmidt AF, McCubrey RO, Holmes MV, Howe LJ, et al. Subsequent Event Risk in Individuals with Established Coronary Heart Disease: Design and Rationale of the GENIUS-CHD Consortium. *Circulation Genomic and precision medicine*. 2019.
41. Davey Smith G, Ebrahim S. 'Mendelian randomization': can genetic epidemiology contribute to understanding environmental determinants of disease? *International Journal of Epidemiology*. 2003;32(1):1-22.

■ Prevalent CAD cases ■ CAD free at baseline

MI

CAD death

Ischaemic stroke

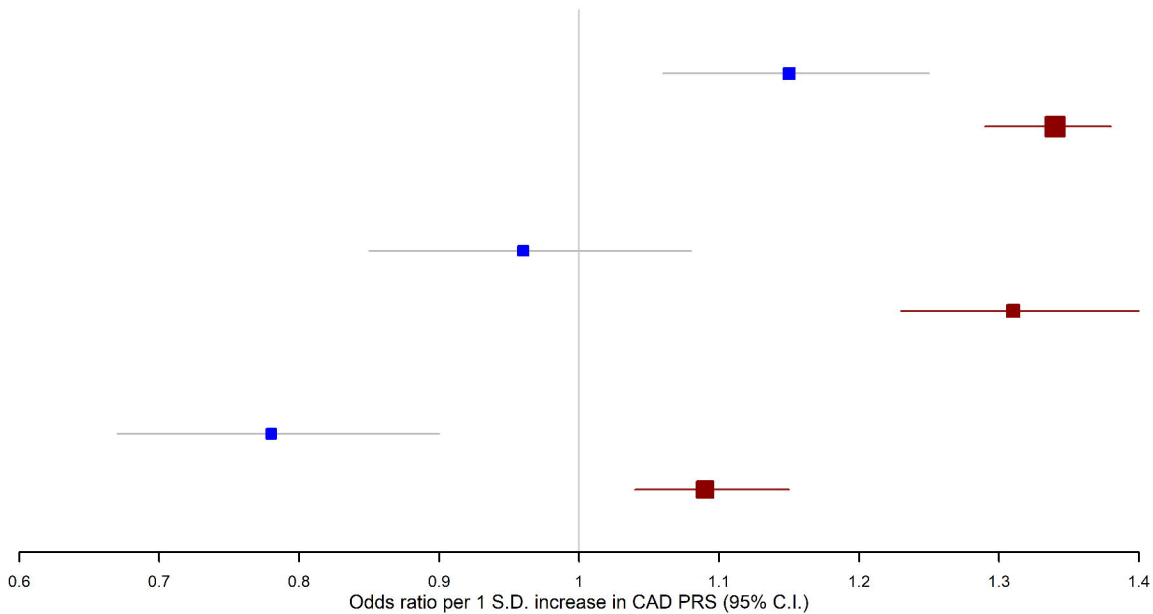

Source: https://medrxiv.org/content/medrxiv/early/2019/10/16/19009431.full.pdf
